# Supplementary material for: Identification and Functional Analysis of Key Autophosphorylation Residues of Arabidopsis Senescence Associated Receptor-like Kinase
Source: MDPI journal article supplement (doi:10.3390/ijms23168873), 2022-08-09
Supplement: s1 [file s1]

**Table S1.** Sequences of the primers used in this study.

| Name    | Primer sequence (5'-3')             |
|---------|-------------------------------------|
| S304A F | CATGTTTATACAGATGGTTTCGCTTCCAAGAACA  |
| S304A R | GCGAAACCATCTGTATAAACATGGAGTTCTCT    |
| S304D F | TGTTTATACAGATGGTTTCGATTCCAAGAA      |
| S304D R | TCGAAACCATCTGTATAAACATGGAGTTCTCT    |
| S305A F | TTATACAGATGGTTTCAGTGCCAAGAACAT      |
| S305A R | CACTGAAACCATCTGTATAAACATGGAGTTCT    |
| S305D F | TTATACAGATGGTTTCAGTGACAAGAACATT     |
| S305D R | TCACTGAAACCATCTGTATAAACATGGAGTTCT   |
| T326A F | GAGGCAAGCTTGGAGATGGGGCAATGGTGGC     |
| T326A R | CCCCATCTCCAAGCTTGCCTCTGTACACATT     |
| T326D F | GAGGCAAGCTTGGAGATGGGGACATGGTGGCAG   |
| T326D R | GTCCCCATCTCCAAGCTTGCCTCTGTACACATT   |
| S340A F | TGAAGGATATTAATGGAACCGCAGGGGATTCA    |
| S340A R | CGGTTCCATTAATATCCTTCAACCGTTTCACT    |
| S340D F | TGAAGGATATTAATGGAACCGACGGGGATTCA    |
| S340D R | GTCGGTTCCATTAATATCCTTCAACCGTTTCACT  |
| S343A F | TTAATGGAACCTCAGGGGATGCACAGTTTCGT    |
| S343A R | CATCCCCTGAGGTTCCATTAATATCCTTCAACCGT |
| S343D F | TTAATGGAACCTCAGGGGATGACCAGTTTCGT    |
| S343D R | GTCATCCCCTGAGGTTCCATTAATATCCTTCAACC |
| S384A F | CCCTTACATGCCTAATGGAGCCGTCGCCTCT     |
| S384A R | GCTCCATTAGGCATGTAAGGGTAAACAAGAAG    |
| S384D F | CCCTTACATGCCTAATGGAGACGTCGCCTCTA    |
| S384D R | TCTCCATTAGGCATGTAAGGGTAAACAAGAAG    |
| S391A F | GCGTCGCCTCTAAGCTTAAAGCTAAACCGGC     |
| S391A R | CTTTAAGCTTAGAGGCGACGCTTCCATTAG      |
| S391D F | GCGTCGCCTCTAAGCTTAAAGATAAACCGGC     |
| S391D R | TCTTTAAGCTTAGAGGCGACGCTTCCATTAG     |
| Y413E F | GTGCAGCGAGAGGTTTGTGTTGAGCTACATGAGCA |
| Y413E R | CTCCAACAAACCTCTCGCTGCACCAATTGCTAT   |
| Y413F F | GTGCAGCGAGAGGTTTGTGTTTCTACATGAG     |
| Y413F R | AACAACAAACCTCTCGCTGCACCAATTGCTAT    |
| S456A F | AGCTCCTTAACCATGCGGATGCTCATGTCAC     |
| S456A R | CATCCGCATGGTTAAGGAGCTTTGCGAGTCC     |
| S456D F | AGCTCCTTAACCATGCGGATGATCATGTCACA    |
| S456D R | TCATCCGCATGGTTAAGGAGCTGCCTTTACAT    |
| T459A F | ACCATGCGGATTCTCATGTGCGAACTGCGGTC    |
| T459A R | CGACATGAGAATCCGCATGGTTAAGGAGCTTTG   |
| T459D F | CCATGCGGATTCTCATGTGCGATACTGCGGTCCG  |
| T459D R | ATCGACATGAGAATCCGCATGGTTAAGGAGCTT   |
| T460A F | ATGCGGATTCTCATGTACAGCTGCGGTCCGT     |

|         |                                     |
|---------|-------------------------------------|
| T460A R | CTGTGACATGAGAATCCGCATGGTTAAGGAGC    |
| T460D F | TGCGGATTCTCATGTCACAGATGCGGTCCGTG    |
| T460D R | TCTGTGACATGAGAATCCGCATGGTTAAGGAG    |
| T465A F | TCACAACTGCGGTCCGTGGTGCGGTTGGCCAC    |
| T465AR  | CACCACGGACCGCAGTTGTGACATGAGAATCC    |
| T465D F | CACAACTGCGGTCCGTGGTGACGTTGGCCACAT   |
| T465D R | GTCACCACGGACCGCAGTTGTGACATGAGAATC   |
| Y473F F | GTTGGCCACATTGCACCTGAATTTCTCTCCACTG  |
| Y473F R | AATTCAGGTGCAATGTGGCCAACCGTACCACGGA  |
| Y473E F | GTTGGCCACATTGCACCTGAAGAACTCTCCACT   |
| Y473E R | TTCTTCAGGTGCAATGTGGCCAACCGTACCACGGA |
| S475A F | CACATTGCACCTGAATATCTCGCCACTGGTCA    |
| S475A R | CGAGATATTCAGGTGCAATGTGGCCAACCGT     |
| S475D F | CACATTGCACCTGAATATCTCGACACTGGTCAGT  |
| S475D R | TCGAGATATTCAGGTGCAATGTGGCCAACCGT    |
| T507A F | GAGAGCTCTTGAGTTTGGTAAAGCCGTTAGCCA   |
| T507A R | CTTTACCAAACCTCAAGAGCTCTCAGTCCGGT    |
| T507D F | GAGAGCTCTTGAGTTTGGTAAAGACGTTAGCCAGA |
| T507D R | TCTTTACCAAACCTCAAGAGCTCTCAGTCCGGT   |
| S509A F | TCTTGAGTTTGGTAAAACCGTTGCCCAGAAAGGA  |
| S509A R | GCAACGGTTTTACCAAACCTCAAGAGCTCTCAGT  |
| S509D F | TGAGTTTGGTAAAACCGTTGACCAGAAAGGA     |
| S509D R | TCAACGGTTTTACCAAACCTCAAGAGCTCTCAG   |
| S588A F | TGGGCTGCTTCGCATAACCATGCACATTTCTA    |
| S588A R | CATGGTTATGCGAAGCAGCCCATCTCTCGGCT    |
| S588D F | TGGGCTGCTTCGCATAACCATGACCATTTCTACC  |
| S588D R | CATGGTTATGCGAAGCAGCCCATCTCTCGGCT    |
| S604A F | TCAAGACAATCTCTTCTCTGGCTACTACTTC     |
| S604A R | CCAGAGAAGAGATTGTCTTGAAAGAGATATTG    |
| S604D F | TCAAGACAATCTCTTCTCTGGATACTACTTC     |
| S604D R | TCCAGAGAAGAGATTGTCTTGAAAGAGATATTG   |
| T605A F | AGACAATCTCTTCTCTGTCTGCTACTTCTGTC    |
| T605A R | CAGACAGAGAAGAGATTGTCTTGAAAGAGAT     |
| T605D F | AGACAATCTCTTCTCTGTCTGATACTTCTGTC    |
| T605D R | TCAGACAGAGAAGAGATTGTCTTGAAAGAGAT    |
| T606A F | CAATCTCTTCTCTGTCTACTGCTTCTGTCTC     |
| T606A R | CAGTAGACAGAGAAGAGATTGTCTTGAAAGAG    |
| T606D F | CAATCTCTTCTCTGTCTACTGATTCTGTCTCA    |
| T606D R | TCAGTAGACAGAGAAGAGATTGTCTTGAAAGAG   |
| S607A F | TCTCTTCTCTGTCTACTACTGCTGTCTCAAG     |
| S607A R | CAGTAGTAGACAGAGAAGAGATTGTCTTGAAAG   |
| S607D F | TCTCTTCTCTGTCTACTACTGATGTCTCAAGGC   |
| S607D R | TCAGTAGTAGACAGAGAAGAGATTGTCTTGAAAG  |
| S609A F | CTCTGTCTACTACTTCTGTCTCGCAAGGCTTGAC  |

|            |                                     |
|------------|-------------------------------------|
| S609A R    | CGACAGAAGTAGTAGACAGAGAAGAGATTGTC    |
| S609D F    | CTCTGTCTACTACTTCTGTGCGATAGGCTTGACG  |
| S609D R    | ATCGACAGAAGTAGTAGACAGAGAAGAGATTGTC  |
| Y620F F    | CACATTGCAATGATCCAACTTTTCAAATGTTTG   |
| Y620F R    | AAAGTTGGATCATTGCAATGTGCGTCAAGC      |
| Y620E F    | ACATTGCAATGATCCAACTGAACAAATGTTTG    |
| Y620E R    | TTCAGTTGGATCATTGCAATGTGCGTCAAGCCTTG |
| S625A F    | CAACTTATCAAATGTTTGGAGCTTCGGCTTTC    |
| S625A R    | CTCCAAACATTTGATAAGTTGGATCATTGCA     |
| S625D F    | CAACTTATCAAATGTTTGGAGATTTCGGCTTTC   |
| S625D R    | TCTCCAAACATTTGATAAGTTGGATCATTGCA    |
| S626A F    | CTTATCAAATGTTTGGATCTGCGGCTTTCGA     |
| S626A R    | CAGATCCAAACATTTGATAAGTTGGATCATT     |
| S626D F    | CTTATCAAATGTTTGGATCTGACGCTTTCGATGA  |
| S626D R    | GTCAGATCCAAACATTTGATAAGTTGGATCATT   |
| S639A F    | ATGATCATCAGCCTTTAGATGCCTTTGCCATG    |
| S639A R    | CATCTAAAGGCTGATGATCATCGTCATCATC     |
| S639D F    | GATGATCATCAGCCTTTAGATGACTTTGCCATG   |
| S639D R    | TCATCTAAAGGCTGATGATCATCGTCATCATCG   |
| S645A F    | GATTCCTTTGCCATGGAAGTAGCCGGTCCAAG    |
| S645A R    | CTAGTTCCATGGCAAAGGAATCTAAAGGCTG     |
| S645D F    | GATTCCTTTGCCATGGAAGTAGACGGTCCAAGA   |
| S645D R    | TCTAGTTCCATGGCAAAGGAATCTAAAGGCTGATG |
| rtAtSARK F | TCCATCGACCAGCTAAGCAGCCT             |
| rtAtSARK R | AGCAGGGAAGGGCCCAGACA                |
| rtSAG12 F  | GGATGTCCCGGTTAATGATG                |
| rtSAG12 R  | TGGAAATCAAAACCACTCC                 |
| rtTIP F    | GTATGAAGATGAACTGGCTGACAAT           |
| rtTIP R    | ATCAACTCTCAGCCAAAATCGCAAG           |

---
